# Supplementary material
Source: PubMed Central journal article supplement (PMC2377396)

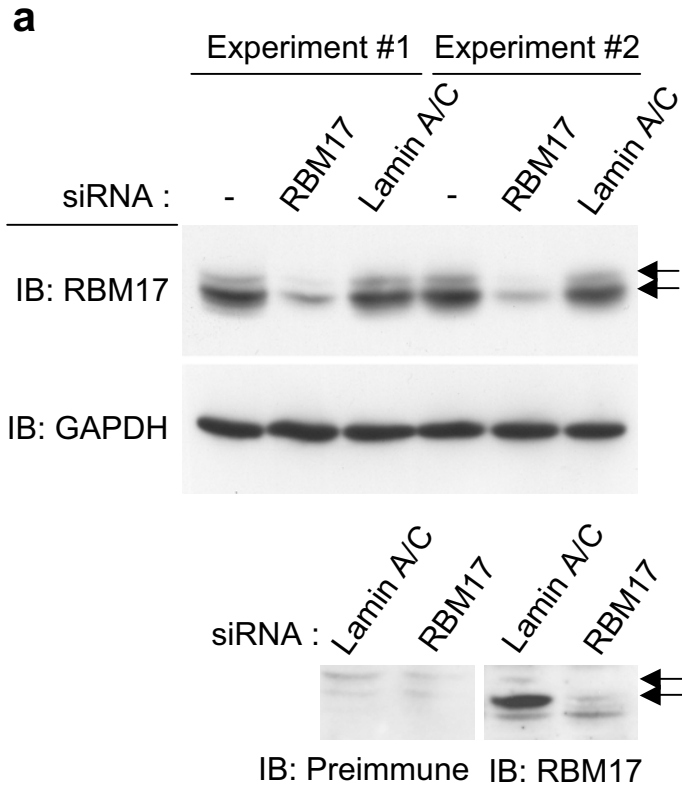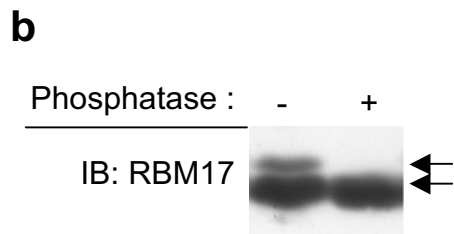

Supplementary Fig. S2

**a**

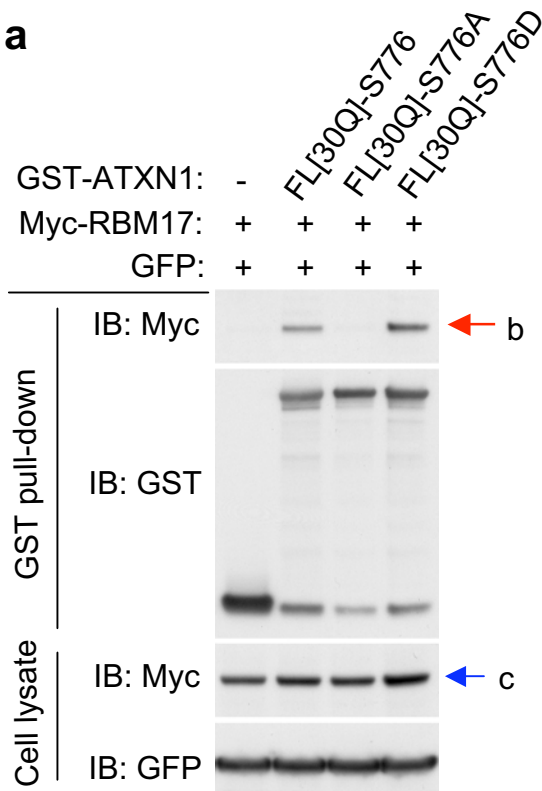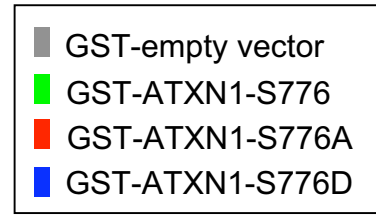

**b**

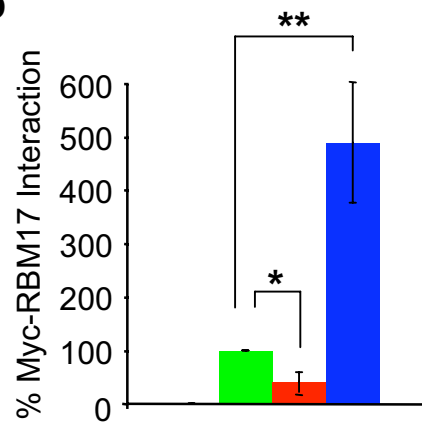

**c**

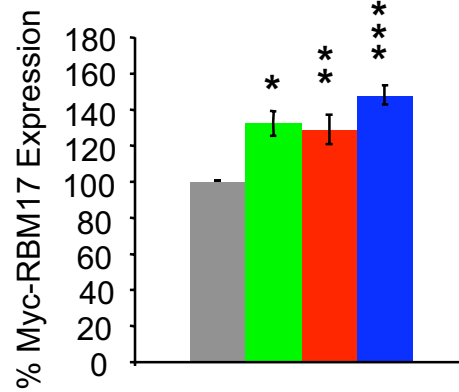

Supplementary Fig. S3

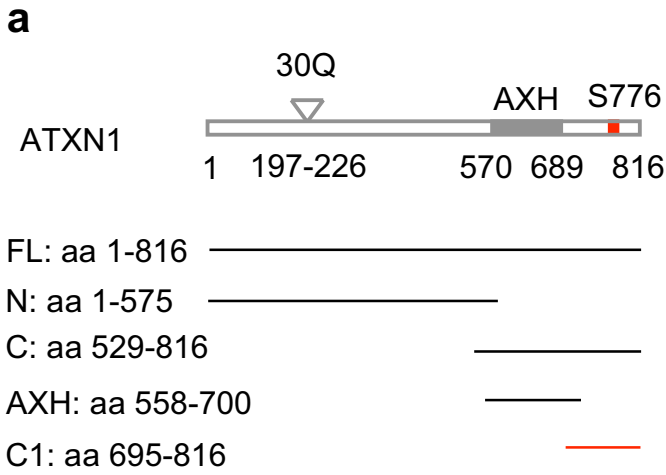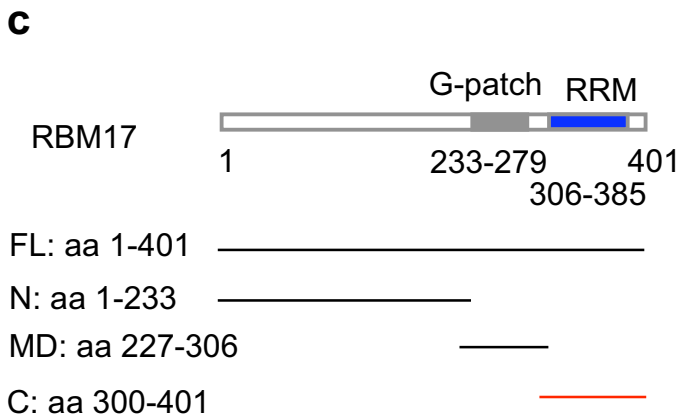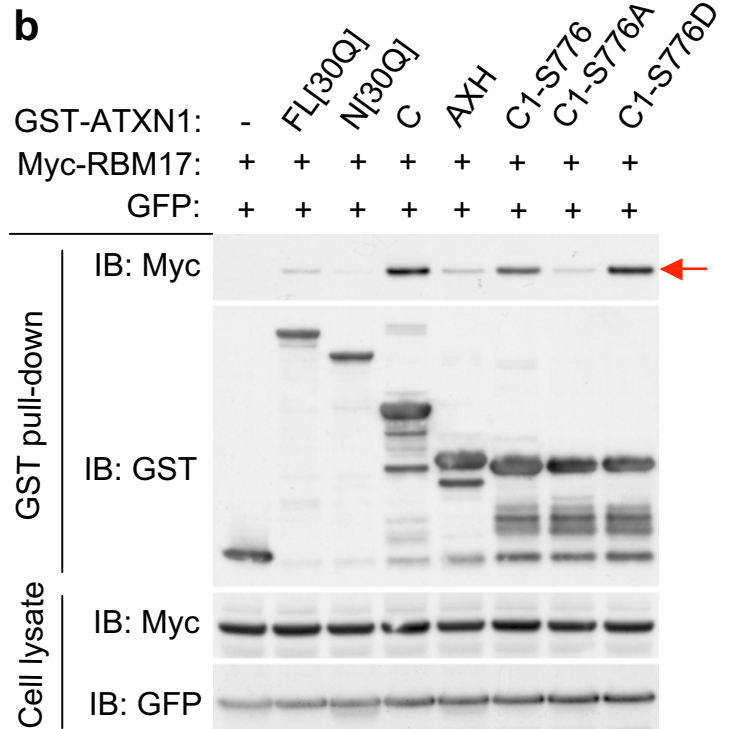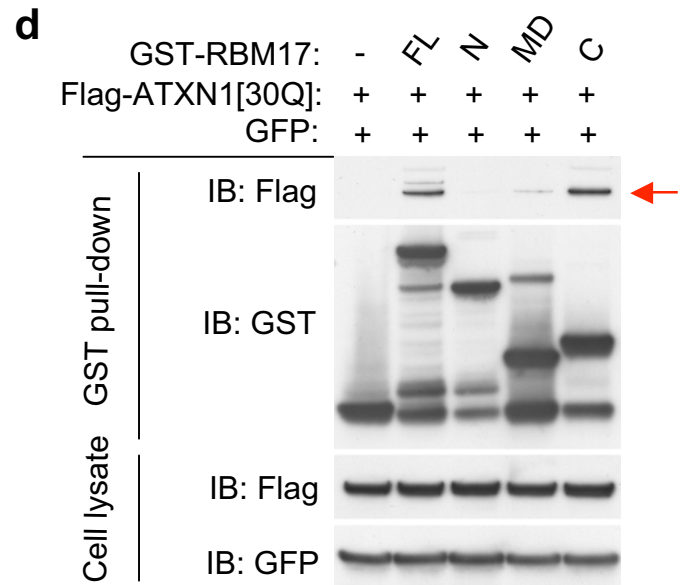

Supplementary Fig. S4

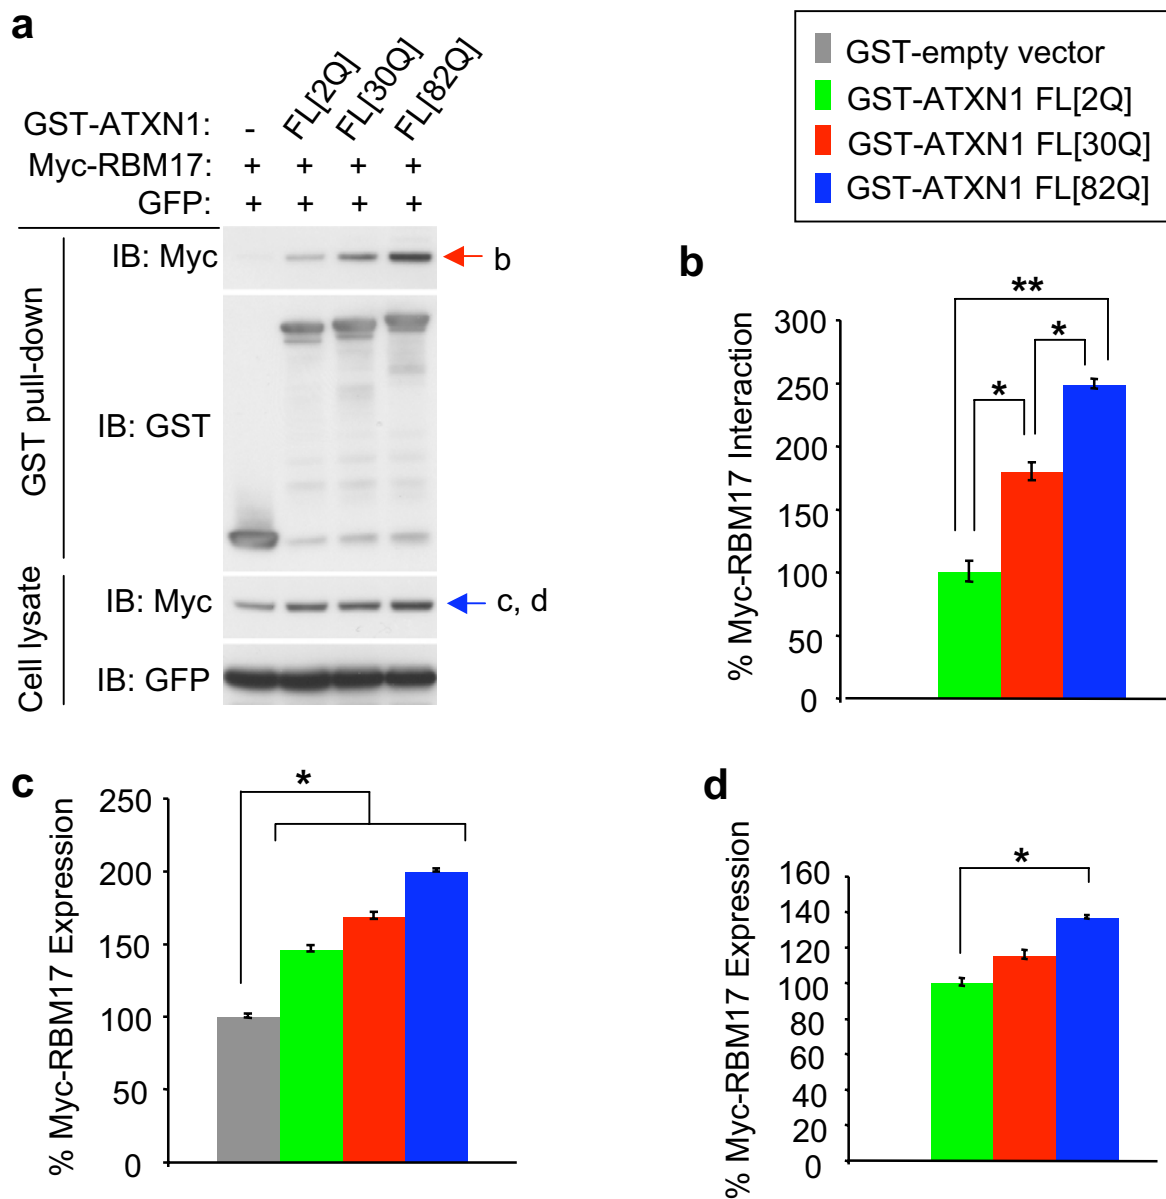

Supplementary Fig. S5

**a**

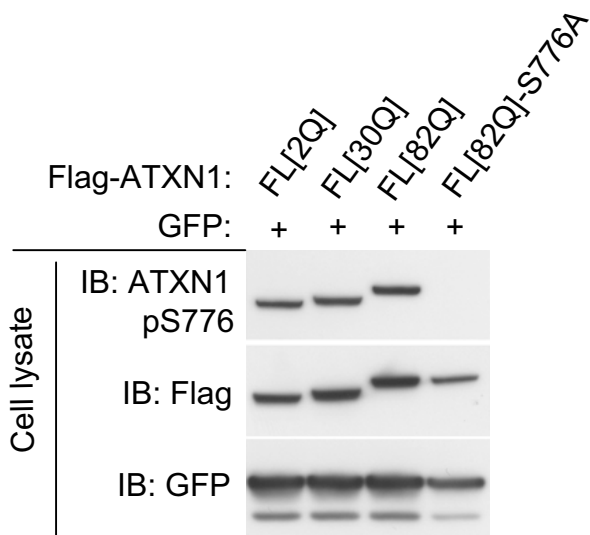

**b**

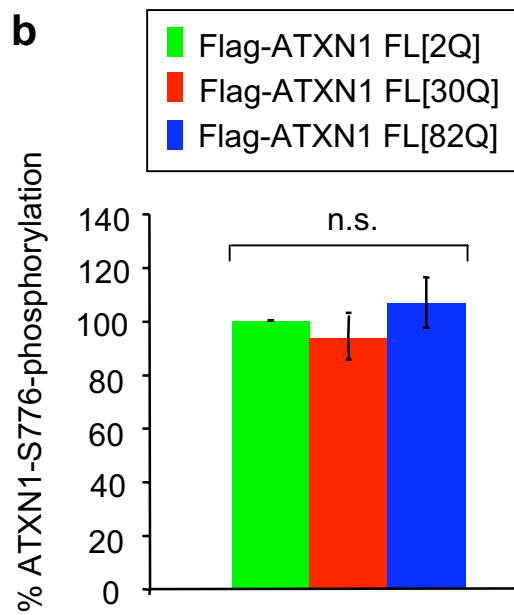

Supplementary Fig. S6

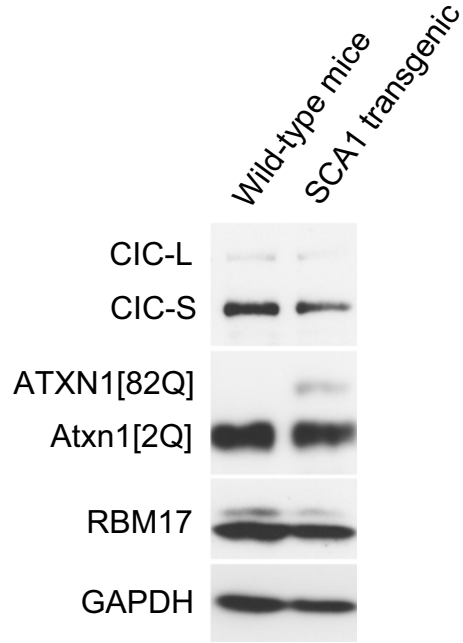

18-week-old mouse cerebellar extract

Supplementary Fig. S7

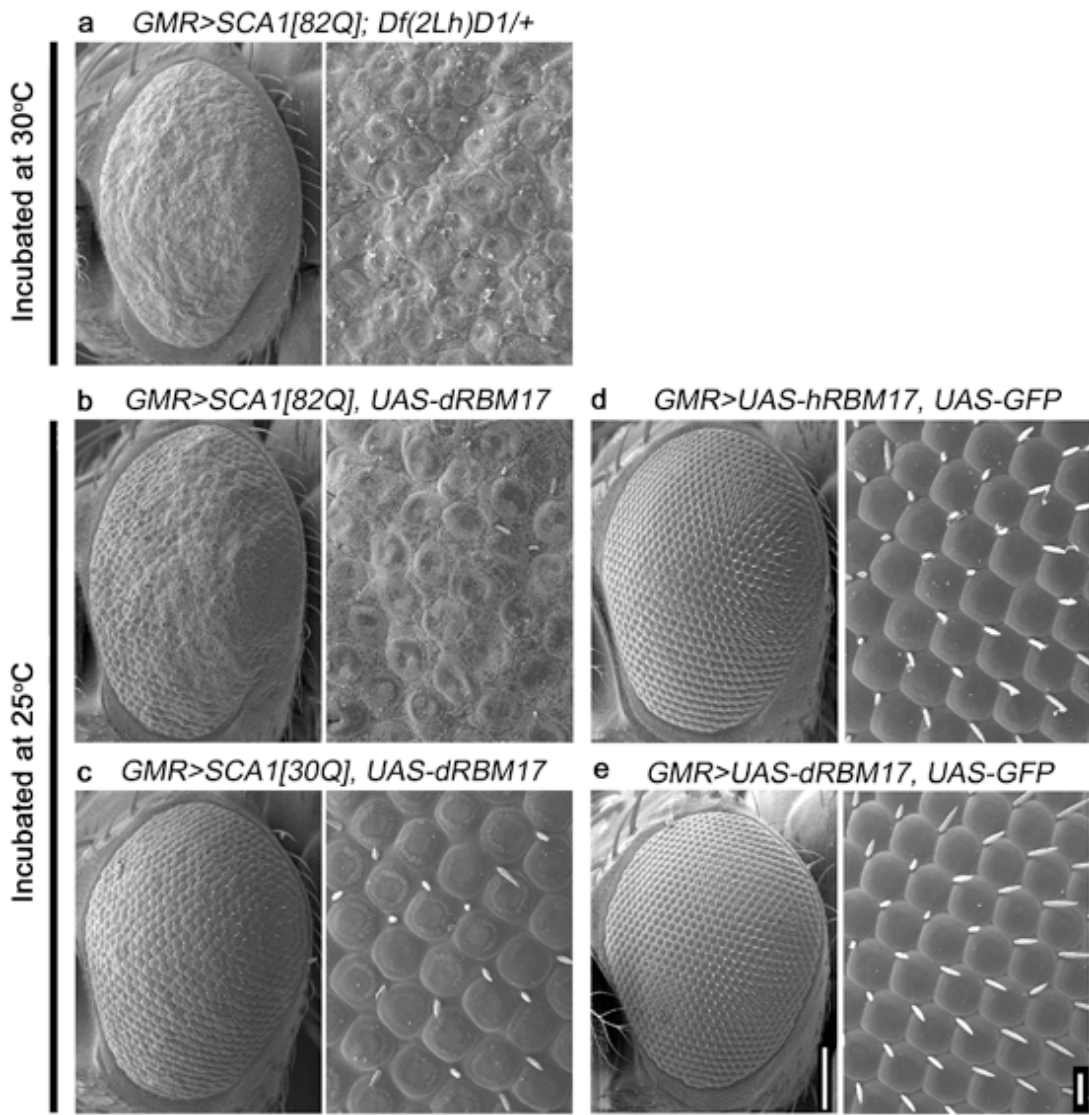

Supplementary Fig. S8

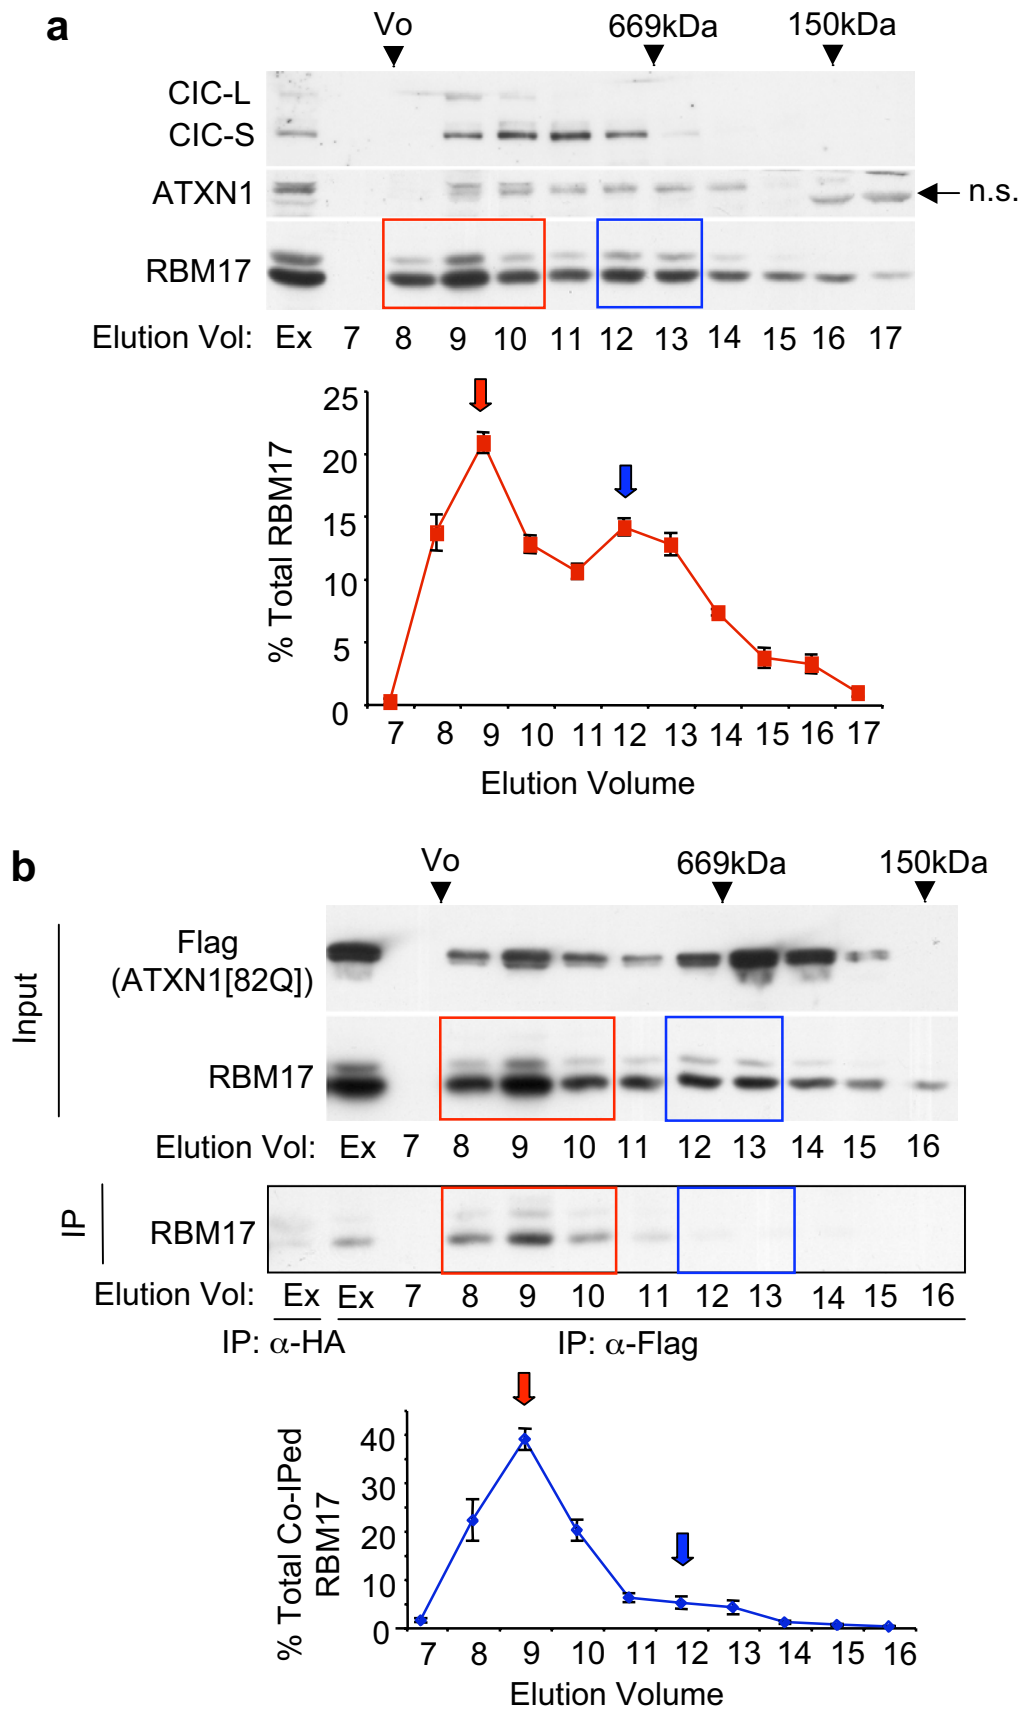



Supplementary Fig. S9

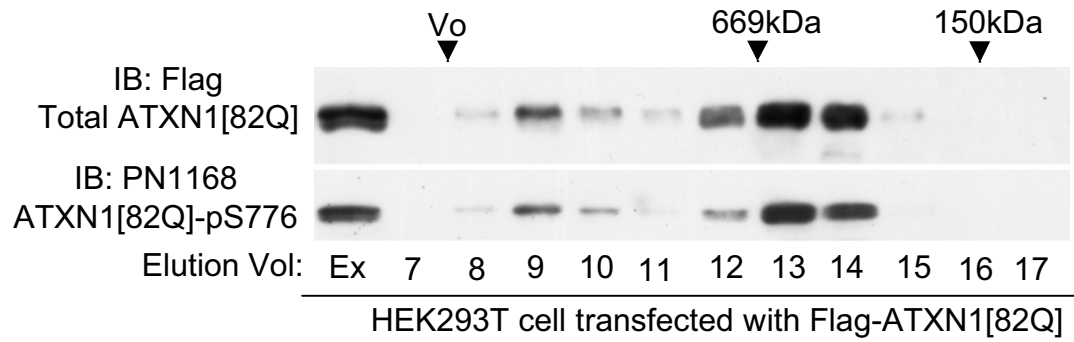

Supplementary Fig. S10

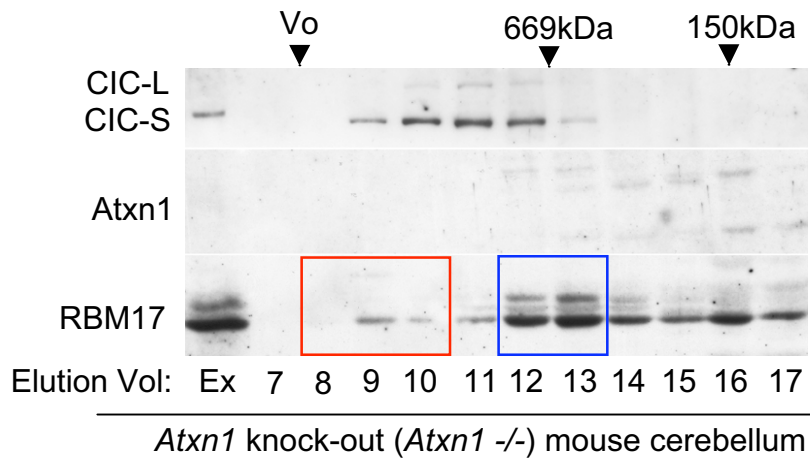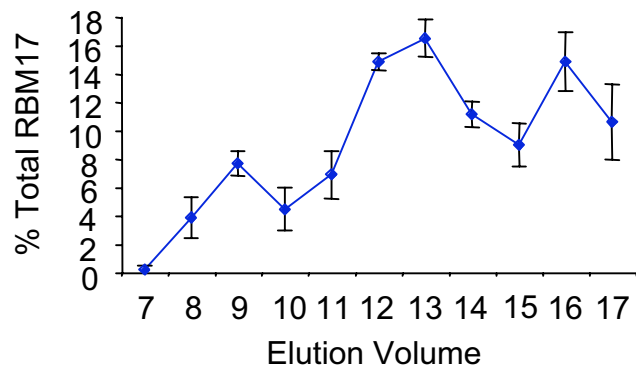

Supplementary Fig. S11

**a**

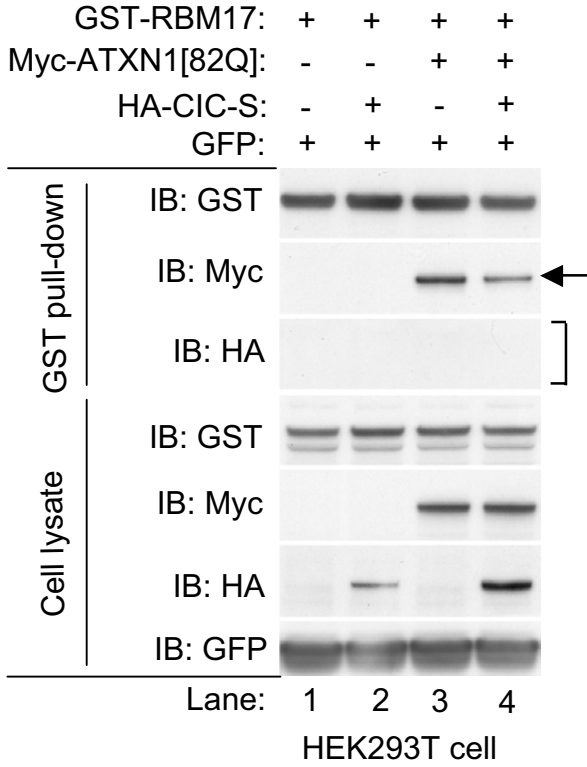

**b**

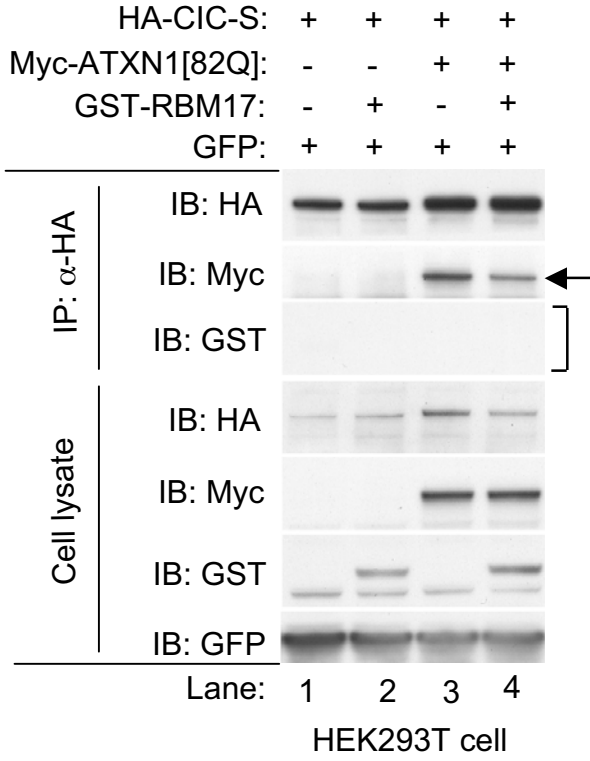

Supplementary Fig. S12

**a** HeLa cell transfected with myc-RBM17

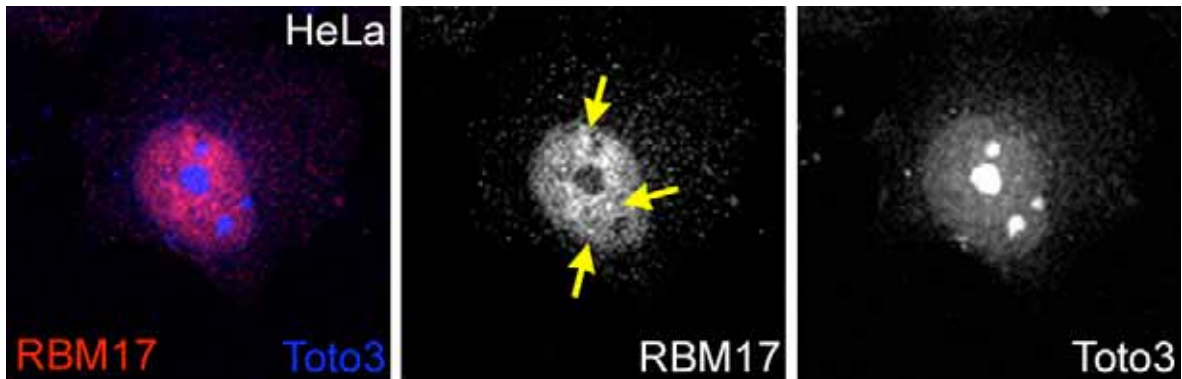

**b** HeLa cell transfected with GFP-ATXN1[82Q] and HA-CIC-S

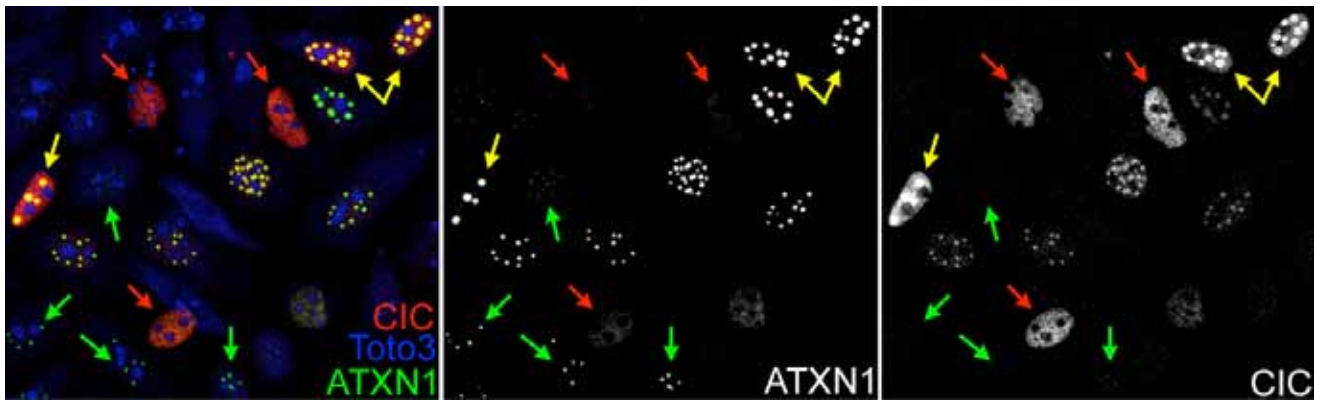

**c** HeLa cell transfected with GFP-ATXN1[82Q] and myc-RBM17

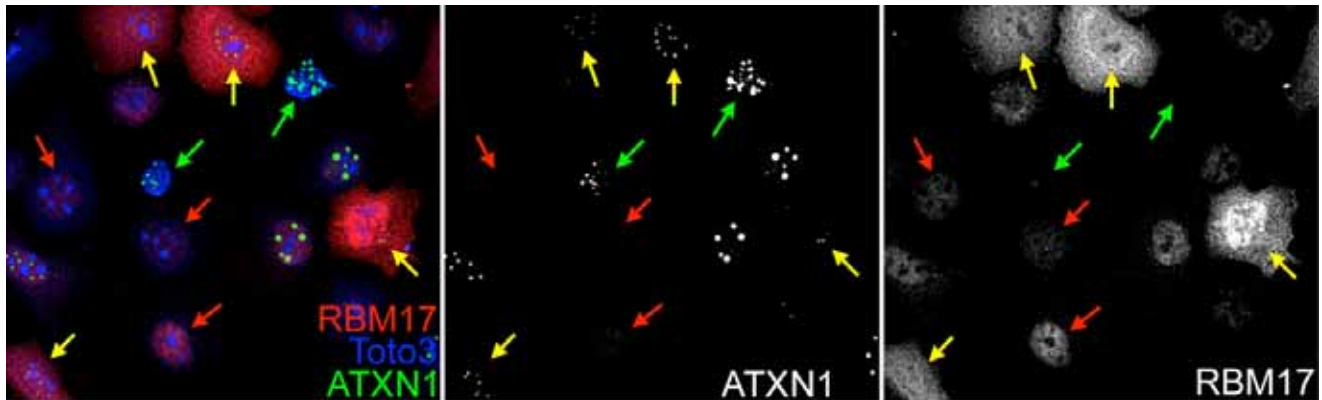

Supplementary Fig. S13

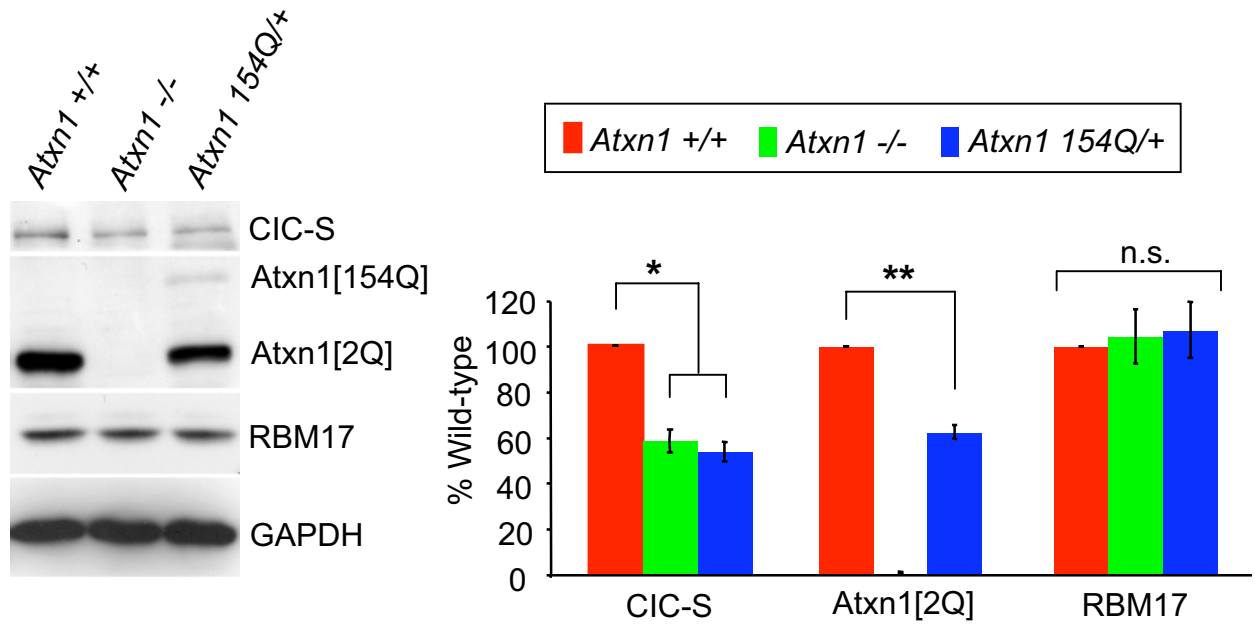

Supplementary Fig. S14

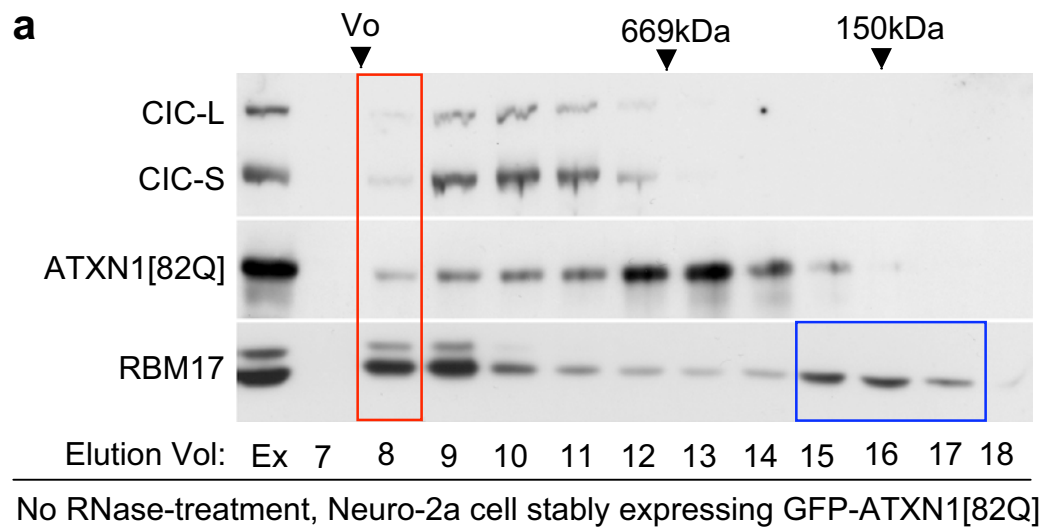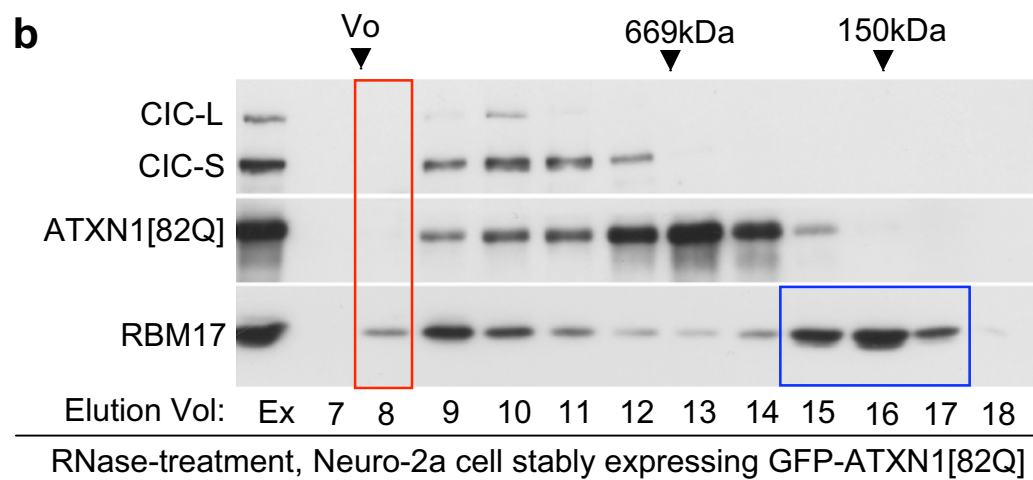

Supplementary Fig. S15

**a**

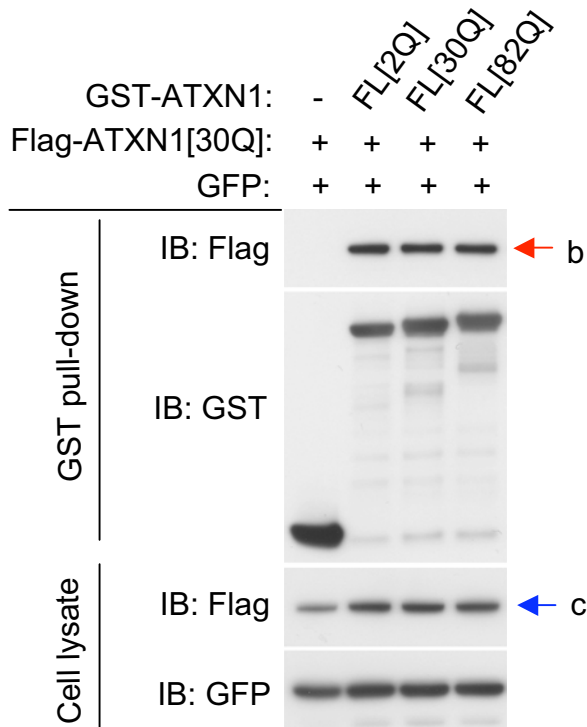

**b**

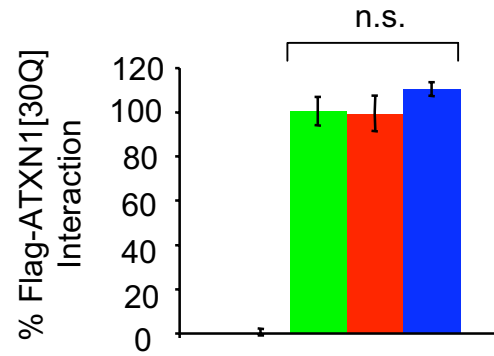

**c**

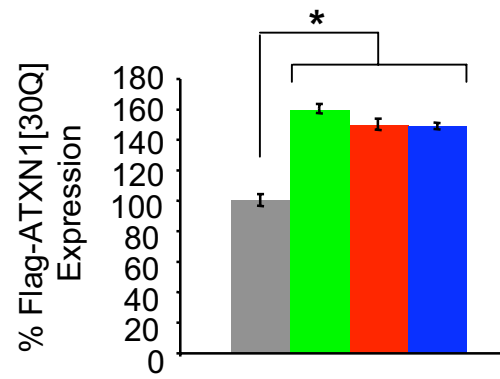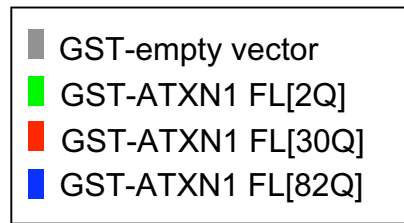

Supplementary Fig. S16-1

**a**

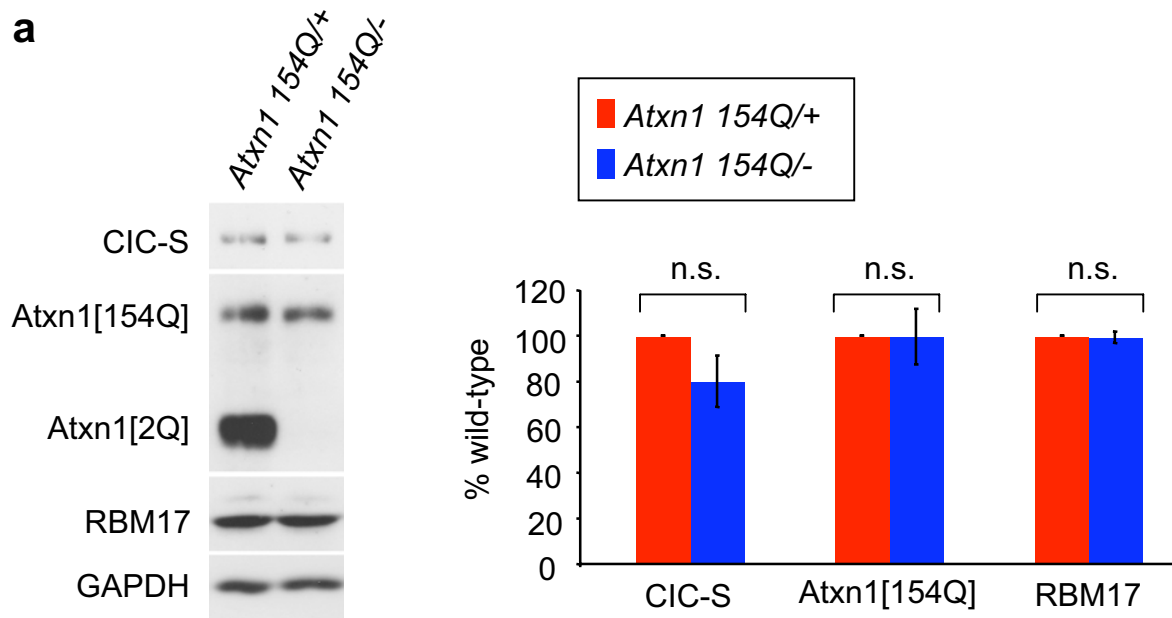

**b**

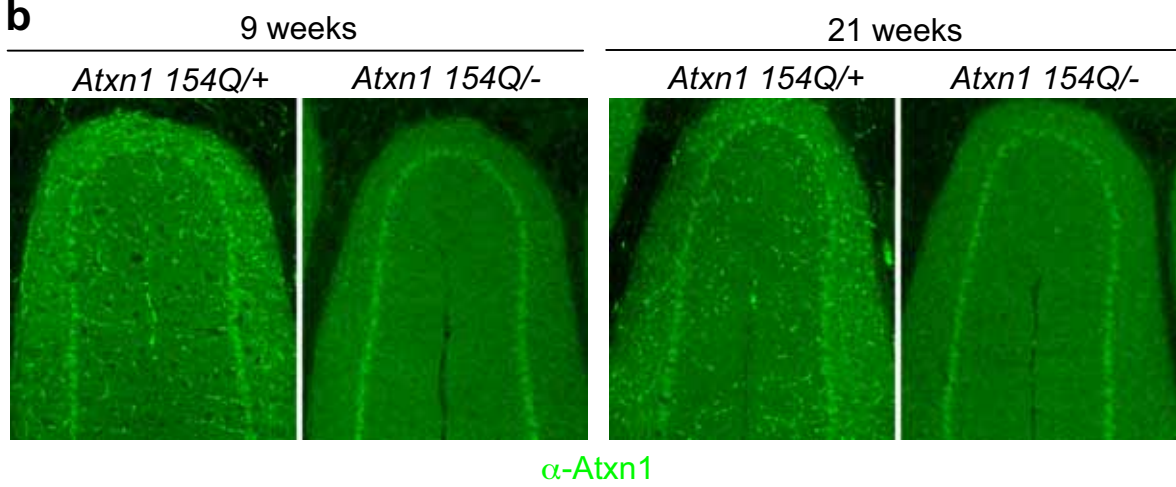



Supplementary Fig. S16-2

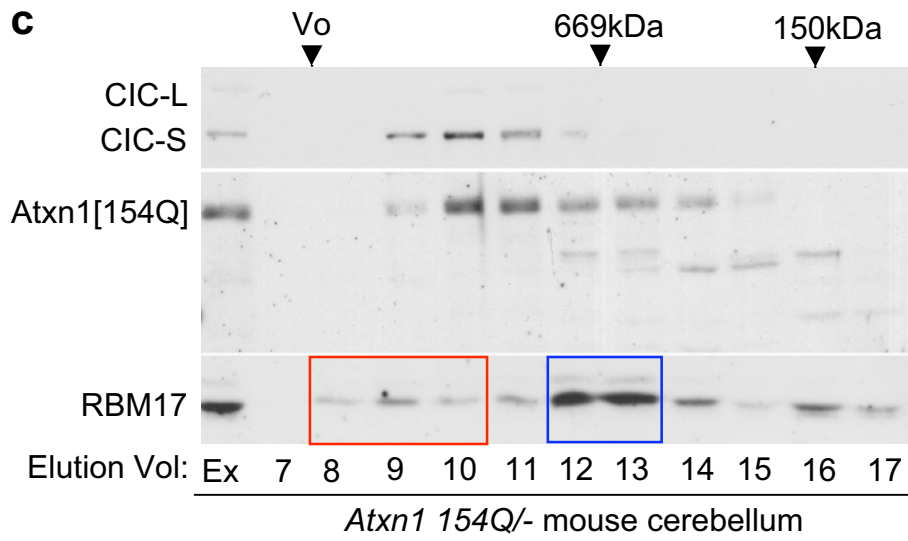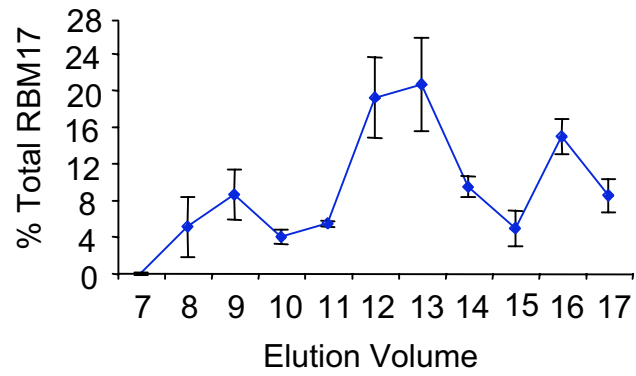

Supplementary Fig. S16-3

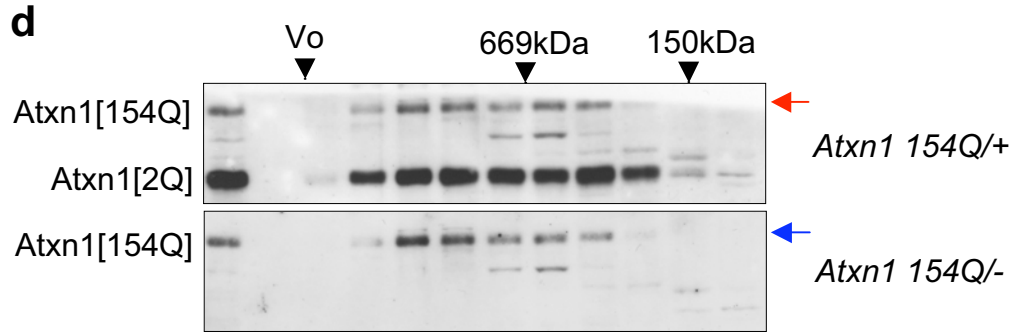

Elution Vol: Ex 7 8 9 10 11 12 13 14 15 16 17

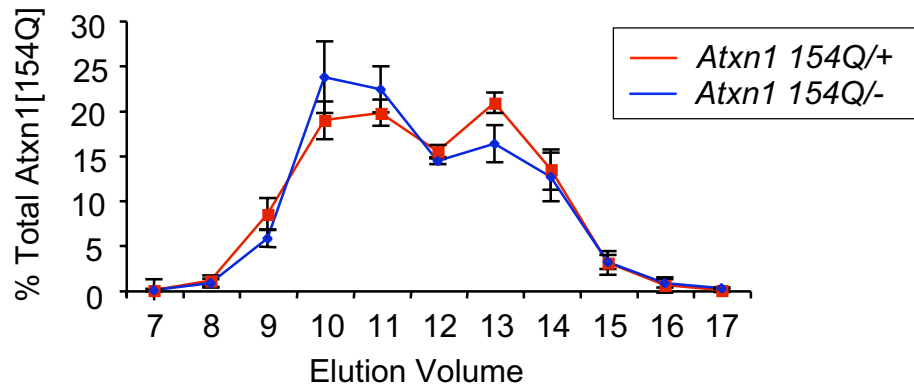

Relative ratio of Vol. 10, 11 to Vol. 13

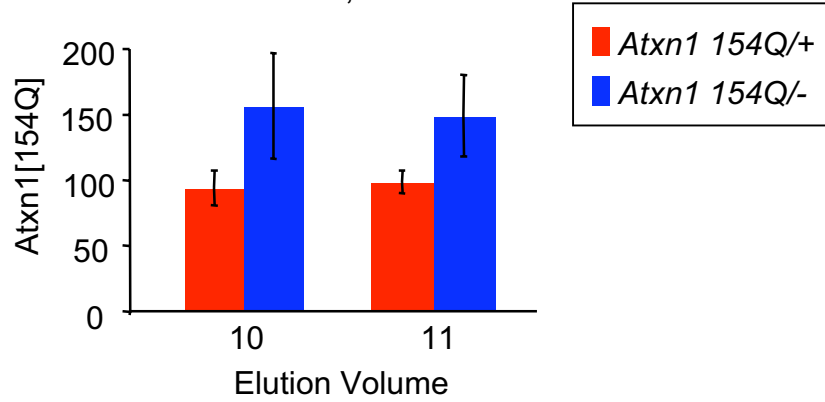

Supplement: NIHMS42225-supplement-Supp_Figure.pdf [file NIHMS42225-supplement-Supp_Figure.pdf]
